# Supplementary material for: Strengthen causal models for better conservation outcomes for human well-being
Source: PLoS One. 2020 Mar 20;15(3):e0230495. doi: 10.1371/journal.pone.0230495 (PMC7083336; doi:10.1371/journal.pone.0230495)
Supplement: S2 Table — (XLSX) [file pone.0230495.s003.xlsx]

## Sheet: Sheet1
			Stage 2			Stage 3
Credible causal models in bold			Criteria 1	Criteria 2	Criteria 3	How is the model presented?
			Describe a causal relationship between X and Y	Describe a set of linked outputs/outcomes or pre-conditions	Describes HOW change would occur
Author(s)	Title	Year published	Causal	Comprehensive	Explicit	Graphical	Formulaic	Narrative	Is it an impact evaluation?	Notes
Adhikari, M; Nagata, S; Adhikari, M.	Rural household and forest: an evaluation of household's dependency on community forest in Nepal.	2004	Y	N	N	N	Y	N	N	Formula for estimating contribution of contextual determinants for different outcomes
Ali, T; Ahmad, M; Shahbaz, B; Suleri, A.	Impact of participatory forest management on vulnerability and livelihood assets of forest-dependent communities in northern Pakistan	2009	N	N	N	Y	N	Y	N	Use the Sustainable Livelihoods Framework, so the links between interventions and outcomes is not comprehensive. But it does illustrate situationally, what components are thought to influence overall context that would determine performance
Almudi T, Berkes F.	Barriers to empowerment: fighting eviction for conservation in a southern Brazil protected area	2010	N	N	N	Y	N	Y	N	Linkages between actors in system not necessarily causal in terms actions that lead to outcomes
Azman et al.	Public Education in Heritage Conservation for Geopark Community		Y	Y	Y	Y	N	Y	N
Baird and Leslie	Conservation as disturbance: Upheaval and livelihood diversification near Tarangire National Park, northern Tanzania		Y	Y	Y	Y	N	Y	N
Baral and Stern	A comparative study of two community-based conservation models in Nepal	2011	Y	Y	Y	N	N	Y	N	Is not v explicit about why ownership would lead to greater support for CBC programs
Bartlett, C.Y.	Emergence, evolution and outcomes of marine protected areas in Vanuatu : implications for social-ecological governance	2009	Y	Y	N	Y	N	Y	N	Does not clearly outline assumptions
Bayala, J; Sanou, J; Teklehaimanot, Z; Kalinganire, A; Ouedraogo, SJ.	Parklands for buffering climate risk and sustaining agricultural production in the Sahel of West Africa	2014	N	N	Y	Y	N	Y	N	Graphic presented as Figure 1 does not represent a change process
Becker, CD; Agreda, A; Astudillo, E; Constantino, M; Torres, P.	Community-based monitoring of fog capture and biodiversity at Loma Alta, Ecuador enhance social capital and institutional cooperation	2005	Y	Y	N	Y	N	Y	N	"It was assessed that monitoring would help change community awareness of these issues and options (Becker 2002). By helping measure fog, local community members would appreciate fog capture more fully. By helping monitor birds, a subset of the community would learn about endemic and endangered species and about the fact that bird watchers might pay to see their unique forest and its birds. Those…
Beitl, CM.	Cockles in custody: The role of common property arrangements in the ecological sustainability of mangrove fisheries on the Ecuadorian coast	2011	N	Y	N	N	N	Y	N	Uses Ostrom's IAD framework to design study
Bennett, NJ; Dearden, P.	Why local people do not support conservation: Community perceptions of marine protected area livelihood impacts, governance and management in Thailand	2014	Y	N	N	Y	N	Y	N	Figure 1 (page 109) the authors purport to be a "modified sustainable livelihoods framework" but it is so general as to be untestable and is in no credible way a theory of change
Bremer, LL; Farley, KA; Lopez-Carr, D.	What factors influence participation in payment for ecosystemservices programs? An evaluation of Ecuador’s SocioPáramo programLeah	2014	Y	N	N	Y	N	Y	N	Figure 1 (page 124) represents that authors' "equity framework" that merely says that through some miraculous process 1) socio-economic, political, environmental and cultural conditions, and 2) PES program design determine with families have equitable access to PES participation.
Brown, P.	Marine Protected Areas, Co-Management and Livelihoods: Coastal Change in Vietnam	2013	N	Y	N	N	N	Y	N	Links components together for an analytical frame but not causal
Byaruhanga, M.B.	Conservation and Development: Bwindi Impenetrable National Park	2008	Y	N	Y	N	N	Y	N	Provides the assumptions and theory upon which community conservation's impacts are based but doesn't clearly outline steps nor pre-conditions
Calkins, P; Thant PP.	Sustainable agro-forestry in Myanmar: from intentions to behavior	2011	Y	N	N	Y	N	Y	N	They refer to is a "conceptual framework" but some of the elements in Figure 1 are not connected to desired outcomes and others do not indicate how attributes of one element say "Food and Health" influence "Green Behavior"
Capistrano, RCG; Charles, AT.	Indigenous rights and coastal fisheries: A framework of livelihoods, rights and equity	2012	N	N	N	Y	N	N	N	Documents flow of analysis
Castello, L; Viana, JP; Watkins, G; Pinedo-Vasquez, M; Luzadis, VA.	Lessons from Integrating Fishers of Arapaima in Small-Scale Fisheries Management at the Mamiraua´ Reserve, Amazon	2009	N	N	N	N	N	Y	N	Ostrom's design principles
Chen, H; Ting, Z; Krott, M; Calvo, JF; Ganesh, SP; Makoto, I.	Measurement and evaluation of livelihood assets in sustainable forest commons governance	2013	Y	N	N	N	N	Y	N	The authors used two hypotheses to guide their research 1) CBNRM has improved livelihood assets of local community residents and 2) observed changes in livelihood assets are different for CBNRM participants and non-participants
Cinner, J; Fuentes, MMPB; Randriamahazo, H.	Exploring Social Resilience in Madagascar’s Marine Protected Areas	2009	N	N	N	Y	N	Y	N	Links aspects that define resilient systems at different scales but does not connect them to outcomes
Clement, F; Amezaga, JM.	Afforestation and forestry land allocation in northern Vietnam: Analysing the gap between policy intentions and outcomes	2009	N	Y	N	Y	N	Y	N	Uses Ostrom's IAD framework
Coulibaly-Lingani, P; Savodogo, P; Tigabu, M; Oden PC.	Factors influencing people's participation in the forest management program in Burkina Faso, West Africa	2011	N	Y	N	Y	N	Y	N	Describes preconditions that would influence desire to participate but does not link to outcomes nor explain how
D'Agnes, L; D'Agnes, H; Schwartz, JB; Amarillo, ML; Castro, J.	Integrated management of coastal resources and human health yields added value: a comparative study in Palawan (Philippines)	2010	Y	N	N	Y	N	Y	N	Graphically illustrates the eco-social systems concept which illustrates that social systems and ecosystems are connected and influence each other (high-level and vague). Narratively explains that incoporating reproductive health services into conservation may result in greater community buy-in and acceptance of conservation interventions and ultimately lead to better outcomes. Does not articulat…
Das	Impact of Participatory Forestry Program on Sustainable Rural Livelihoods: Lessons From an Indian Province	2012	N	Y	N	Y	N	Y	N	Sustainable rural livelihoods framework (components that go into sust. Live.)
Datta and Chatterjee	Assessment of community-based initiatives in sustainable management of Indian dry deciduous forests	2012	N	N	N	N	Y	N	Y	Formulaic illustration of how composite scores for each component are calculated - not a model but a method. Otherwise, model of criteria and indicators does not articulate causality but how each component/condition can be assessed and calculated. Then methodologically, uses regression to look at correlation between component scores and forest condition.
Dev, O. P., Yadav, N. P., Springate-Baginski, O. and Soussan, J. .	Impacts of community forestry on livelihoods in the Middle hills of Nepal.	2003	N	N	N	N	N	Y	N	Methodology model
Dhakal, N.P.	Assessment of residents' social and economic wellbeing in conservation resettlement: A case study of Padampur, Chitwan National Park, Nepal	2011	N	Y	N	N	N	Y	N	categorizing risks not linking causally
Dolisca et alia	Factors influencing farmers’ participation in forestry management programs: A case study from Haiti	2006	N	N	N	N	N	Y	N	Examines enabling conditions and motivations for participation of farmers in conservation projects/PAs. Employs theoretical model to frame study but social exchange theory only states that people are more likely to participate where they benefit.
Dolisca, McDaniel and Teeter	Farmers' perceptions towards forests: A case study from Haiti	2007	N	N	N	N	N	Y	N	Uses social exchange theory to frame study
Elbakidze and Angelstam	Implementing sustainable forest management in Ukraine’s Carpathian Mountains: The role of traditional village systems	2007	N	Y	N	N	N	Y	N	Uses a landscape concept to frame the paper, essentially form of social-ecological system but not explicitly linked to outcomes
Everard and Kataria	Recreational angling markets to advance the conservation of a reach of the Western Ramganga River, India	2011	Y	N	Y	Y	N	N	N	Figure 1 just represents likely linkages habitats, ecosystem services and societal uses of these services. This is not a ToC
Ezebilo	Community Forestry as Perceived by Local People Around Cross River National Park, Nigeria	2012	N	N	Y	N	Y	N	N	Uses a logit model to test factors that would influence participant perceptions about the community forestry project and whether they perceived the project benefits them. Technically also there is a narrative articulation of why increased positive perception of benefits would result in better forest and people outcomes - that is causal, comprehensive, and explicitly - but its not about the interv…
Ezebilo, E. E.	Local participation in forest and biodiversity conservation in a Nigerian rain forest	2011	N	N	N	N	Y	Y	N	Formula is a logit model but theoretical framing for participation is narrative
Ezebilo, E. E.	Nature conservation in Cross River National Park, south-east Nigeria: Promoting collaboration between local people and conservation authorities	2013	N	N	N	N	Y	N	N	Formula for probability that certain groups choose different approaches
Fabricius and Collins	Community-based natural resource management: governing the commons	2007	N	Y	N	Y	N	N	N	Uses asset/capitals framework to understand how they might influence success/failure of CBNRM
Ferraro & Hanauer	Quantifying causal mechanisms to determine how protected areas affect poverty through changes in ecosystem services and infrastructure	2014	Y	Y	Y	Y	N	Y	Y
Fu, B; Wang, K; Lu, Y; Liu, S; Keming, M; Chen, L; Liu, G.	Entangling the Complexity of Protected Area Management: The Case of Wolong Biosphere Reserve, Southwestern China	2004	N	Y	N	Y	N	Y	N	The authors "conceptual framework" is not a ToC just a graphic of broad categories of a attributes - PA management, Landuse history, environmental regime - and arrows showing how they might influence other attributes
Fu, Y; Grumbine, RE; Wilkes A; Wang, Y; Xu JC; Yang, YP.	Climate Change Adaptation Among Tibetan Pastoralists: Challenges in Enhancing Local Adaptation Through Policy Support	2012	Y	N	N	Y	N	Y	N	Authors simply state that mobility, storage, communal pooling, and diversification are local strategies for minimizing the impact of climate shocks
Gbadegesin, A.	Management of forest resources by women: a case study from the Olokemeji Forest Reserve area, southwestern Nigeria	1996	N	N	Y	N	N	Y	N	Qualitative recall-based assessment of impact of structural adjustment program on forest use in 10 villages in Nigeria
Gjertsen, H.	Can Habitat Protection Lead to Improvements in Human Well-Being? Evidence from Marine Protected Areas in the Philippines	2005	Y	Y	N	Y	N	Y	N	Figure 1 simply shows a set of elements and how they might be interrelated. Study uses a regression analysis to determine significant factors
Glew, L., Hudson, M.D., and Osborne, P.E.	Evaluating the Effectiveness of Community-Based Conservation in Northern Kenya	2010	N	Y	N	Y	N	N	N	WB Poverty Framework that illustrates elements of poverty and interlinkages
Greenheck, F.M.	Environmental Conservation and Sustainable Livelihoods: An Anthropological approach towards community-based custody and valuation of local resources in the context of marine turtle conservation in Costa Rica	2009	N	N	N	N	N	Y	N	Livelihoods framework
Groom and Palmer	REDD+ and rural livelihoods	2012	N	N	Y	N	N	Y	N	Pre-post assessment of impact of PES project on labor allocation (on-farm agriculture, on-farm reforestation, off-farm) and household income with sampling in three strata - PES+microenterprise, PES only, neither.
Gruby and Basurto	Multi-level governance for large marine commons: Politics and polycentricity in Palau’s protected area network	2013	N	Y	N	Y	N	Y	N	Ostrom's Institutional Analysis
Grundy, IM; Campbell, BM; White, RM; Prabhu, R; Jensen, S, Ngamile, TN.	PARTICIPATORY FOREST MANAGEMENT IN CONSERVATION AREAS: THE CASE OF CWEBE, SOUTH AFRICA	2004	N	N	N	N	N	Y	N	Designed a conceptual framework but never present it clearly
Ha, TTP; van Dijk, H, Visser, L.	Impacts of changes in mangrove forest management practices on forest accessibility and livelihood: A case study in mangrove-shrimp farming system in Ca Mau Province, Mekong Delta, Vietnam	2014	Y	N	Y	N	N	Y	N	Authors refer to a "theoretical framework but this simply means a literature review on tenure and resource governance
Ha, TTP; van Dijk, H; Bosma, R; Sinh, LX	LIVELIHOOD CAPABILITIES AND PATHWAYS OF SHRIMP FARMERS IN THE MEKONG DELTA, VIETNAM	2013	N	Y	N	N	N	Y	N	Livelihoods framework
Hack	Payment schemes for hydrological ecosystem services as a political instrument for the sustainable management of natural resources and poverty reduction – a case study from Bel´en, Nicaragua	2010	Y	Y	N	Y	N	Y	N	Fig2 and Fig 3 and associated narrative simply describe the organizational arrangement for the PES scheme and how the payments are arranged
Haglund, E; Jupiter N; Snook, L; Pasternak, D.	Dry land tree management for improved household livelihoods: Farmer managed natural regeneration in Niger	2011	Y	N	N	Y	N	Y	Y	Modified sustainable livelihoods framework in context of intervention
Hagos, F.; Holden, S.	Tenure security, resource poverty, public programs, and household plot-level conservation investments in the highlands of northern Ethiopia	2006	Y	Y	Y	N	Y	Y	N	Formulaic
Hajjar, Kozak and Innes	Is Decentralization Leading to “Real” Decision-Making Power for Forestdependent Communities? Case Studies from Mexico and Brazil	2012	Y	N	Y	Y	N	Y	N	Conceptual framework in Figure 1 was generated from the initial research and then used to organize and interpret the results
Hajjar, R; McGrath DG, Kozak, RA, Innes, JL.	Framing community forestry challenges with a broader lens: Case studies from the Brazilian Amazon	2011	Y	Y	Y	Y	N	Y	N
Halim, Salleh and Omar	ENGAGING THE LOCAL COMMUNITY IN PARTICIPATORY RESOURCE MANAGEMENT THROUGH LEARNING: THE EXPERIENCE FROM LANGKAWI ISLAND, MALAYSIA	2011	N	N	Y	N	N	Y	N	This paper is based on "open coding" of ethnographic interviews. Using the term "Yellowstone model" probably was what the search string picked up.
Hansen	New geographies of conservation and globalisation: the spatiality of development for conservation in the iSimangaliso Wetland Park, South Africa	2013	N	N	N	Y	N	N	N	Research is structured around Lefebvre (1992) concept of spatial production - conceived space, lived space and perceived space - Figure 3. This is a framework for design and interpretation of research not a ToC
Hara, M.M.	Efficacy of rights-based management of small pelagic fish within an ecosystems approach to fisheries in South Africa	2014	N	Y	N	N	N	Y	N	Only a conceptual framework based on the ecosystem approach to fisheries
Hart, K. A.; Gray, T.; Stead, S. M.	Consumptive versus non-consumptive use of sea turtles? Stakeholder perceptions about sustainable use in three communities near Cahuita National Park, Costa Rica	2013	N	Y	N	N	N	Y	N	TPB - but not articulated specific to the context
Hausser, Y.; Weber, H.; Meyer, B.	Bees, farmers, tourists and hunters: Conflict dynamics around Western Tanzania protected areas	2009	N	N	Y	N	N	Y	N
Hayati, Abadi, Movahedi and Heidai	An empirical model of factors affecting farmers’ participation in natural resources conservational programs in Iran	2009	N	Y	N	N	N	Y	N	Factors that influence participation in a program
Hayes, T. and Persha, L.	Nesting local forestry initiatives: Revisiting community forest management in a REDD+ world	2010	N	N	N	N	N	N	N	Hierarchy/categorization - not change pathways
Hegde, R.; Enters, T.	Performance of an agro-forestry based Payments-for-Environmental-Services project in Mozambique: A household level analysis	2011	Y	Y	N	Y	N	Y	Y	Graphical but does not explain how change occurs
Himoonde, T.	Opportunities and Constraints of Local Participation in Ecotourism : A Case Study of Kasanka National Park (KNP), Zambia	2007	Y	N	Y	Y	N	Y	N	Describes ecotourism impacts but is not explcit about steps. Uses political ecology theory for assumptions
Idrissou, L.; Aarts, N.; Van Paassen, A.; Leeuwis, C.	The discursive construction of conflict in participatory forest management: The case of the Agoua forest restoration in Benin	2011	N	N	Y	N	N	Y	N	Discusses how individuals manage conflict but not where this emerges in the pathway
Ijang, T. P.; Cleto, N.	Dependency on natural resources: Post-conflict challenges for livelihoods security and environmental sustainability in Goma, The Democratic Republic of Congo	2013	N	N	N	N	N	Y	N	Livelihoods model
Illukpitiya, P.; Yanagida, J. F.	Role of income diversification in protecting natural forests: Evidence from rural households in forest margins of Sri Lanka	2008	N	Y	Y	N	Y	Y	N	How do different socio-economic groups/education/income diversification contribute to forest dependence
Islam and Sato	Protected Sal Forest and Livelihoods of Ethnic Minorities: Experience From Bangladesh	2013	N	N	N	N	N	Y	N	5 livelihoods framework
Jackson, L.; van Noordwijk, M.; Bengtsson, J.; Foster, W.; Lipper, L.; Pulleman, M.; Said, M.; Snaddon, J.; Vodouhe, R.	Biodiversity and agricultural sustainagility: From assessment to adaptive management	2010	N	N	N	Y	N	Y	N	Describing influences at different scales
Jackson, M. M.; Naughton-Treves, L.	Eco-bursaries as incentives for conservation around Arabuko-Sokoke Forest, Kenya	2012	N	N	N	N	N	N	N
Jhamvar-Shingote, R.; Schuett, M. A.	The Predators of Junnar: Local Peoples' Knowledge, Beliefs, and Attitudes Toward Leopards and Leopard Conservation	2013	N	N	Y	N	N	Y	N	Describes mechanisms (why someone would do something but not clear on steps)
Kalikoski, D. C.; Neto, P. Q.; Almudi, T.	Building adaptive capacity to climate variability: The case of artisanal fisheries in the estuary of the Patos Lagoon, Brazil	2010	N	N	N	Y	N	N	N	Not related to the research question
Kaltenborn, B. P.; Nyahongo, J. W.; Kideghesho, J. R.	The attitudes of tourists towards the environmental, social and managerial attributes of Serengeti National Park, Tanzania	2011	N	N	N	N	N	N	N
Karanth, K. K.; Nepal, S. K.	Local residents perception of benefits and losses from protected areas in India and Nepal	2012	N	N	N	N	N	N	N
Kari et alia	Growth, equity and vulnerability in marine park areas	2011	N	N	N	Y	N	N	N	Sustainable livelihoods approach
Karki, M.; Badoni, A.; Tiwari, B. K.; Bhattarai, N.		2005	N	N	N	N	N	N	N	Components analyzed in context of sustainable livelihoods approach
Karki, S. T.	Do protected areas and conservation incentives contribute to sustainable livelihoods? A case study of Bardia National Park, Nepal		Y	Y	Y	Y	N	Y	N
Kashaigili, J. J.; Rajabu, K.; Masolwa, P.	Freshwater management and climate change adaptation: Experiences from the great Ruaha River catchment in Tanzania	2009	N	N	N	N	N	N	N	No model afterall
Kashwan, P.	The politics of rights-based approaches in conservation	2013	N	N	N	N	N	Y	N	Describes how study is analysed with a political economy perspective and social justice within nature conservation
Kaushal, K. K.; Kala, J. C.	Applying the sustainable livelihood approach to Joint Forest Management projects in India	2004	N	N	N	N	N	Y	N	Uses sustainable livelihoods approach to shape conservation planning - not to describe theory of change
Kibria, A. S. Md G.; Jashimuddin, M.; Makoto, I.	Effects of participatory forest management on livelihood capitals of the community in Cox's Bazar, Bangladesh	2013	N	Y	N	N	N	Y	N	Identifies components of livelihoods that are likely to change along with some details on conditions, but does not describe cause and effect with regard to the intervention
Kijazi, M. H.; Kant, S.	Forest stakeholders' value preferences in Mount Kilimanjaro, Tanzania	2010	N	Y	N	N	Y	N	N	Looks at how predictor variables might be linked to social preferences via ordinary least squares
Kisekka-Ntale	Carnage in Paradise: Law and Decision-making Rights in Protected Area Management in Western Kenya	2009	N	N	N	Y	N	Y	N	Analytical framework for understanding components in structure of resource institutions
Kitamura, K.; Clapp, R. A.	Common property protected areas: Community control in forest conservation	2013	N	N	N	N	N	Y	N	Property rights theory for common pool resources
Kohlin, G. and Amacher, G. S.	Welfare implications of community forest, American, plantations in developing countries: the Orissa Social Forestry Project.	2005	Y	N	N	N	Y	Y	Y	Econometric model of how community forest would lead to change in welfare
Koli, A.	Community forest management addressing social vulnerability of forest communities in Bangladesh	2013	N	N	Y	N	N	Y	N	Use the environmental entitlement framework to explain how entitlements would contribute to social vulnerability but does not provide detail on pre-conditions or link explicitly to the intervention at hand
Kumar et alia	Assessing wetland ecosystem services and poverty interlinkages: a general framework and case study	2011	N	Y	N	Y	N	Y	N	Sustainable livelihoods framework to examine how livelihood components are linked to external context but does not document a causal process
Kusters, K., Achdiawan, R., Blecher, B., Ruiz perez, M..	Balancing development and conservation? An assessment of livelihood and environmental outcomes of non-timber forest product trade in Asia, Africa, and Latin America.	2006	N	N	N	N	N	N	N
Lai, P. H.; Nepal, S. K.	Local perspectives of ecotourism development in Tawushan Nature Reserve, Taiwan	2006	N	N	N	Y	N	Y	N	How attitudes, values, and ecotourism design are interconnected
Lambini, C. K. and Nguyen, T. T.	A comparative analysis of the effects of institutional property rights on forest livelihoods and forest conditions: Evidence from Ghana and Vietnam	2014	Y	Y	N	Y	Y	Y	N	Takes a Property Rights framework + New Institutional Economics applied to a Sustainable Livelihoods Framework
Lapeyre, R.	The grootberg lodge partnership in namibia:Towards poverty alleviation and empowerment for long-term sustainability	2011	Y	Y	N	N	N	Y	N	There is no graphical ToC representing links between conservation and long-term goals.
Le, H.D.	What drives the success of reforestation projects in tropical developing countries? The case of the Philippines	2014	Y	Y	N	Y	N	N	N	Shows what types of conditions may influence indicators of success, but does not explain how
Leach, H. B.; Van der Stege, C.; Vogl, C. R.	Baobab (Adansonia digitata L.) and Tamarind (Tamarindus indica L.) Management Strategies in the Midst of Conflict and Change: A Dogon Case Study from Mali	2011	N	Y	N	N	N	Y	N	Describes poorly how bundles of rights are important and linked to welfare outcomes.
Lee, T.M	Determinants of local people’s attitude toward conservation and the consequential effects on illegal resource harvesting in the protected areas of Sulawesi (Indonesia)	2009	Y	Y	N	Y	N	N	N	The just have a diagram that shows the hypothesized between illegal resource use, sociodemographic factors, interactions with PAs and perceptions of PAs with Conservation attitude toward PAs.
Lescuyer, G.	Sustainable Forest Management at the Local Scale: A Comparative Analysis of Community Forests and Domestic Forests in Cameroon	2013	N	N	N	N	N	Y	N	Sustainable livelihoods framework
Lian, G.; Guo, X. D.; Fu, B. J.; Wang, J.; He, T.	Farmer's perception and response towards land policy and eco-environment based on participatory rural appraisal: A case study in the Loess hilly area, China	2007	N	N	N	N	N	N	N	There is no graphical ToC in this paper, and really no theoretical model in general between conservation and outcomes.
Liang, Y.; Li, S.; Feldman, M. W.; Daily, G. C.	Does household composition matter? The impact of the Grain for Green Program on rural livelihoods in China	2012	Y	Y	N	Y	Y	Y	N	Sustainable Livelihoods Framework formulated in a household analytical model
Lima	Community capitals and ecotourism for enhancing Amazonian forest livelihoods	2011	Y	Y	N	N	N	Y	N	Links community characteristics, processes, and outputs and outcomes but does not explain how
Liu, J.	The role of social capital in encouraging residents’ pro-environmental behaviors in community-based ecotourism		Y	Y	Y	Y	N	Y	N
Liu, W.	Patterns and impacts of tourism development in a coupled human and natural system	2008	N	Y	N	Y	N	Y	Y	Identifies interlinkages between humans, ecosystems, and pandas
Logan, B. I.; Moseley, W. G.	The political ecology of poverty alleviation in Zimbabwe's Communal Areas Management Programme for Indigenous Resources (CAMPFIRE)	2002	Y	N	N	N	N	Y	N	Links between elements are not clear and model is not clearly defined (have to infer from the text)
Luo and Deng	The New Environmental Paradigm and Nature-Based Tourism Motivation	2007	Y	N	N	Y	N	Y	N	Graphical model does not conform to criteria to be a ToC. Basically it is a set of boxes arrows connecting them. Tourists connects to Ecotourism connects ot Ecotourism market/ecotourists - utter nonsense
Macura, B.; Zorondo-Rodrguez, F.; Grau-Satorras, M.; Demps, K.; Laval, M.; Garcia, C. A.; Reyes-Garca, V.	Local community attitudes toward forests outside protected areas in India. Impact of legal awareness, trust, and participation	2011	N	N	N	Y	N	Y	N	There are no linkages between conservation and changes or outcomes shown in a graphical representation.
Mahanty, S.; Suich, H.; Tacconi, L.	Access and benefits in payments for environmental services and implications for REDD+: Lessons from seven PES schemes	2013	Y	Y	N	N	N	Y	N	Presents links between PES and changes in livelihoods, but is not explicit about how change is achieved. However, does outline determinants that may be important (broad classes)
Mahdi, ; Shivakoti, G.; Schmidt-Vogt, D.	Livelihood Change and Livelihood Sustainability in the Uplands of Lembang Subwatershed, West Sumatra, Indonesia, in a Changing Natural Resource Management Context	2009	N	Y	N	Y	N	Y	N	Sustainable livelihoods framework applied in context to changing natural resource management context. Explains some of the factors that are linked to livelihood, but not link from management to outcomes nor mechanisms
Mannigel, E.	Integrating parks and people: How does participation work in protected area management?	2008	N	N	N	N	N	Y	N	Describes modified ladder of participation and how it manifests in different participatory conservation approaches but does link to outcomes
Mapedza	Narratives from a wetland: Sustainable management in Lukanga, Zambia	2012	N	Y	N	Y	N	Y	N	Political ecology theory (Trottier's framework) used to explain pre-conditions/factors that would influence power dynamics and interpretation of management policy
Marchant	Protected areas in Northern Colombia – on track to sustainable development?	2013	Y	N	N	Y	N	Y	N	Generic description of Sustainable livelihoods framework without clear and explicit framing within study context
Marcus, R. R.	Seeing the forest for the trees: Integrated conservation and development projects and local perceptions of conservations in Madagascar	2001	Y	N	N	N	N	Y	N	"Following ICDP theory, we can assume that the success of the ICDP rests to some degree on its ability to create viable economic alternatives that augment the income level of the populations of the target regions."
Marfo, E.	Institutionalizing citizen participation and community representation in natural resource management: Lessons from the social responsibility agreement negotiation in Ghana	2008	N	N	N	Y	N	N	N	Ladder of participation - factors that would influence participation but not causally related nor within context of intervention
Marschke, M.; Armitage, D.; le van, An; van Tuyen, T.; Mallee, H.	Do collective property rights make sense? insights from central Vietnam	2012	N	N	N	Y	N	Y	N	Property rights framework where bundles of rights and holders of rights are arranged in different systems in differnet contexts
Marschke, M.; Sinclair, A. J.	Learning for sustainability: Partipatory resource management in Cambodian fishing villages	2009	Y	N	Y	N	N	Y	N	Transformative learning theory for how participatory governance would lead to learning and social change
Maryudi, A.; Devkota, R. R.; Schusser, C.; Yufanyi, C.; Salla, M.; Aurenhammer, H.; Rotchanaphatharawit, R.; Krott, M.	Back to basics: Considerations in evaluating the outcomes of community forestry	2012	Y	Y	Y	N	N	Y	N	Theory of conditions and assumptions needed for community forestry to achieve set of objectives. Narratively described but hard to envision the number of crosslinkages without visual
Matta, J. R.; Alavalapati, J. R. R.	Perceptions of collective action and its success in community based natural resource management: An empirical analysis	2006	Y	N	Y	N	N	Y	N	Speaks to conditions needed for CBNRM success
Mbaiwa	The effects of tourism development on rural livelihoods in the Okavango Delta, Botswana	2010	Y	Y	N	N	N	Y	N	Sustainable livelihoods framework connecting people's livelihood assets to tourism development that lead to livelihood outcomes
Mbaiwa, J. E.	Changes on traditional livelihood activities and lifestyles caused by tourism development in the Okavango Delta, Botswana	2011	N	Y	N	N	N	Y	N	Describes the preconditions that shape tourism industry
Mbaiwa, J. E.; Ngwenya, B. N.; Kgathi, D. L.	Contending with unequal and privileged access to natural resources and land in the Okavango Delta, Botswana	2008	Y	N	Y	N	N	Y	N	Sustainable livelihoods framework as a mode to connect differences in access resulting from natural resource management to differential outcomes
McCall	Assessing participatory GIS for community-based natural resource management: claiming community forests in Cameroon	2005	N	Y	N	Y	N	Y	N	Describes good governance characteristics and associated indicators but does describe how and why these would lead to desired outcomes from interventions
McCarthy, N.; Dutilly-Diane, C.; Drabo, B.	Cooperation, collective action and natural resources management in Burkina Faso	2004	N	Y	N	N	N	Y	N	Describes conditions under which communities would be able to achieve collective action
McCusker, B.; Oberhauser, A. M.	An assessment of womens access to natural resources through communal projects in South Africa	2006	Y	N	N	Y	N	Y	N	Has a conceptual model but does not provide level of detail to show how conservation action leads to long term goal
McDuff	Building the Capacity of Grassroots Conservation Organizations to Conduct Participatory Evaluation	2001	Y	Y	N	Y	N	Y	N	Describes program model for participatory evaluation but does not define assumptions nor pathways
McKay, B.	Using community radio in Ghana to facilitate community participation in natural resource management	2009	N	N	N	N	N	Y	N	Appreciative inquiry (methodology)
Medina, G.; Pokorny, B.; Campbell, B. M.	Community forest management for timber extraction in the Amazon frontier	2009	Y	Y	Y	N	N	Y	N	There is no graphic depiction of their casual model
Mehring	Local institutions: Regulation and valuation of forest use—Evidence from Central Sulawesi, Indonesia	2011	Y	N	N	N	N	Y	N	institutional Analysis and Development (IAD) framework - describes generally how institutional design is linked to types of incentives but does not make clear steps, assumptions
Mendez, V. E.; Bacon, C. M.; Olson, M.; Morris, K. S.; Shattuck, A.	Agrobiodiversity and shade coffee smallholder livelihoods: A review and synthesis of ten years of research in Central America	2010	N	N	N	N	N	N	N	There is not graphical depiction of a causal pathway
Misra	Production analysis of collaborative forest management using an example of joint forest management from Gujarat, India	2004	Y	Y	N	Y	Y	Y	N	Links factors in the production system to outputs but does not explain assumptions nor mechanisms
Mohammed	Exploring decentralized forest management in Ethiopia using actor-power-accountability framework: case study in West Shoa zone	2013	Y	Y	N	Y	N	Y	N	Demonstrates links but is not explicit about assumptions that underlie model
Mohammed	Linking outputs and outcomes from devolved forest governance using a Modified Actor-Power-Accountability Framework (MAPAF): Case study from Chilimo forest, Ethiopia	2014	Y	Y	N	Y	N	Y	N	Demonstrates links but is not explicit about assumptions that underlie model
Mohammed, A. J.; Inoue, M.	Forest-dependent communities' livelihood in decentralized forest governance policy epoch: case study from West Shoa zone, Ethiopia	2013	Y	Y	N	N	N	Y	N	Details conditions, components and causal links, but does not explain assumptions nor mechanisms
Mosimane, A. W.; McCool, S.; Brown, P.; Ingrebretson, J.	Using mental models in the analysis of human-wildlife conflict from the perspective of a social-ecological system in Namibia	2014	N	Y	N	Y	N	Y	N	Factors that contribute to human-wildlife conflict, but not a change process
Mukadasi, B.; Kaboggoza, J. R.; Nabalegwa, M.	Agroforestry practices in the buffer zone area of Mt Elgon National Park, eastern Uganda	2007	N	Y	N	N	Y	Y	N	Factors that contribute to adoption of agroforestry, not change process
Mulale, K.; Flora, C.	The creation of social capital through networks in Botswana's CBNRM	2006	N	N	N	Y	N	Y	N	DescrIbes existing networks of CBNRM organizations but not change process
Mullan, K.; Kontoleon, A.; Swanson, T. M.; Zhang, S.	Evaluation of the impact of the natural forest protection program on rural household livelihoods	2009	Y	N	N	N	Y	Y	N	Difference in difference model used to identify matching (counterfactual/treatment) - method to examine causality not a model to describe assumptions and hypothesis of change
Mulyoutami, E.; Rismawan, R.; Joshi, L.	Local knowledge and management of simpuking (forest gardens) among the Dayak people in East Kalimantan, Indonesia	2009	N	N	N	Y	N	Y	N	Graphic model describes farming system
Mustalahti, I.; Nathan, I.	Constructing and sustaining participatory forest management: Lessons from Tanzania, Mozambique, Laos and Vietnam	2009	Y	Y	N	Y	N	Y	N	Describes model and components that need to be linked, but they are not a change process nor explained how they change
Nath	Forest Villagers in Northeastern Hill Forests of Bangladesh: Examining Their Livelihoods, Livelihood Strategies and Forest Conservation Linkages	2014	Y	N	N	Y	N	Y	N	Describes connection between forest conservation and livelihood assets and outcomes but does not clearly explain how one leads to another or assumptions
Nath, T. K.; Inoue, M.	Forest-based settlement project and its impacts on community livelihood in the chittagong hill tracts, Bangladesh	2009	N	N	N	N	N	Y	N	Sustainable livelihoods framework to categorize outcomes, not documenting change process or explaining mechanisms/assumptions
Nath, T. K.; Inoue, M.	The upland settlement project of Bangladesh as a means of reducing land degradation and improving rural livelihoods	2008	N	N	N	N	N	Y	N	Sustainable livelihoods framework to categorize assets and outcomes but no change process documented
Neupane	Adoption of agroforestry in the hills of Nepal: a logistic regression analysis	2002	Y	N	N	Y	Y	Y	N	Details links between agroforestry and components that would influence adoption but does not detail process nor assumptions
Nguyen, T.N.	Role of social capital in natural resource conservation: A case study of Cat Tien National Park in Vietnam	2007	Y	Y	N	Y	N	Y	N	Not explicit in assumptions (HOW)
Nicholas	RESIDENTS’ PERSPECTIVES OF A WORLD HERITAGE SITE The Pitons Management Area, St. Lucia	2009	N	Y	N	Y	N	Y	N	How conditions would impact support for intervention but not how intervention would lead to change
Njana, M. A.; Kajembe, G. C.; Malimbwi, R. E.	Are miombo woodlands vital to livelihoods of rural households? Evidence from Urumwa and surrounding communities, Tabora, Tanzania	2013	N	N	N	Y	N	Y	Y	Describes relationships between components not a change process
Njifonjou, O.; Satia, B. P.; Angaman, K.	Fisheries co-management and poverty alleviation in the context of the sustainable livelihoods approach: A case study in the fishing communities of Aby lagoon in Cote d'Ivoire	2006	Y	Y	N	N	N	Y	N	Describes which management approaches would lead to changes in livelihood assets and outcomes but does not outline assumptions nor explicit change process
Nkemnyi, M. F.; de Haas, A.; Etiendem, N. D.; Ndobegang, F.	Making hard choices: Balancing indigenous communities livelihood and Cross River gorilla conservation in the Lebialem-Mone Forest landscape, Cameroon	2013	Y	Y	N	Y	N	Y	N	HOW one gets between stages is not clear, assumptions unclear
Nunan	Empowerment and Institutions: Managing Fisheries in Uganda	2006	Y	Y	N	Y	N	Y	N	Does not explain how change occurs (mechanisms) nor assumptions
Nyaupane	LINKAGES AMONG BIODIVERSITY, LIVELIHOOD, AND TOURISM	2011	N	N	N	N	N	N	N	Appreciative inquiry (methodology)
Oberholzer	The socio-economic impact of Africa’s oldest marine park	2010	Y	N	N	Y	N	Y	N	Describes socio-economic impacts as linked to the national park objectives and actors, but does not detail steps for change to occur, nor preconditions, nor assumptions
Ogra, M. V.	Human-wildlife conflict and gender in protected area borderlands: A case study of costs, perceptions, and vulnerabilities from Uttarakhand (Uttaranchal), India	2008	Y	N	Y	Y	N	Y	N	Describes a derived model on impacts of human wildlife conflict events from a national park on different genders. However, while the outcomes are laid out, the steps by which they occur is not clear (how are they linked?)
Ormsby, A.; Kaplin, B. A.	A framework for understanding community resident perceptions of Masoala National Park, Madagascar	2005	N	Y	N	Y	N	Y	N	Factors that influence participation and perceptions but not clear on linked steps and no assumptions
Ostwald, M.; Baral, R.	Local forest protection, gender and caste - Dhani Hill, Orissa, India	2000	N	Y	N	N	N	Y	N	Describes how different groups are hypothesized to interact with joint forest management, but not clear how it links to outcomes nor clear assumptions underlying these relationships
Pegas, F. D. V.; Coghlan, A.; Stronza, A.; Rocha, V.	For love or for money? Investigating the impact of an ecotourism programme on local residents' assigned values towards sea turtles		Y	Y	Y	Y	N	Y	N
Pemunta, N. V.	The governance of nature as development and the erasure of the Pygmies of Cameroon	2013	N	Y	N	N	N	Y	N	Impoverishment Risks and Reconstruction (IRR) model - outlines risks of resettlement that should be taken into consideration, but not a causal pathways between resettlement and outcomes, nor assumptions and mechanisms
Pratt	Local community attitudes to wildlife utilisation in the changing economic and social context of Mongolia		Y	Y	Y	Y	N	Y	N
Quaedvlieg, J.; Garcia Roca, I. M.; Ros-Tonen, M. A. F.	Is Amazon nut certification a solution for increased smallholder empowerment in peruvian amazonia?	2014	Y	N	Y	Y	N	Y	N	Identifies theoretical "strands" important for causal pathway but does not clearly outline steps between certificatio and empowerment beyond identifying factors that will contribute
Ramaharitra, T.T.	Human dimension of conservation planning: the case of Madagascar at national and regional scales	2012	N	N	N	Y	N	Y	N	Identifying model variables to map out suitable land for rice fields not causal
Ramcilovic-Suominen, S.; Matero, J.; Shannon, M. A.	Do Forest Values Influence Compliance with Forestry Legislation? The Case of Farmers in the Fringes of Forest Reserves in Ghana	2013	N	N	Y	N	N	Y	N	Cognitive hierarchy model and value blieve norm theory and law compliance theory - used to define assumption that farmers' values towards forest will influence personal beliefs and norms which will inform compliance with rules regulating tree felling
Reddy, V. R.; Reddy, M. G.; Galab, S.; Soussan, J.; Springate-Baginski, O.	Participatory watershed development in India: Can it sustain rural livelihoods?	2004	N	Y	N	N	N	Y	N	Detail on how variables are connected to livelihood assets but not causal between intervention and outcomes, pathway not defined
Reimer, J. K.; Walter, P.	How do you know it when you see it? Community-based ecotourism in the Cardamom Mountains of southwestern Cambodia	2013	N	N	N	N	N	N	N
Rishi, P.	Joint forest management in India: An attitudinal analysis of stakeholders	2007	N	N	Y	N	N	N	N	Defines how attitudes would influence pathway but does not define the pathway
Rishi, P.; Moghe, S.; Upadhyay, B. K.	Eco-development planning through psychological analysis: A study of perceptions and motivations	2007	Y	Y	N	Y	N	Y	N	Defines pathway but does not talk about assumptions nor how change would occur
Roy Dr, A. K. D.; Gow, J.	Attitudes towards current and alternative management of the Sundarbans Mangrove Forest, Bangladesh to achieve sustainability	2013	Y	N	N	N	N	Y	N	Applying Schlager and Ostrom framework on property rights to understand how tenure regime impacts corruption and participation - but does not detail pathway between tenure regime and outcomes nor explain assumptions
Roy, A. K. D.; Alam, K.; Gow, J.	Community perceptions of state forest ownership and management: A case study of the Sundarbans Mangrove Forest in Bangladesh	2013	Y	N	N	Y	N	Y	N	Applying Schlager and Ostrom framework on property rights to understand how tenure regime impacts corruption and participation - but does not detail pathway between tenure regime and outcomes nor explain assumptions
Roy, A. K. D.; Alam, K.; Gow, J.	Sustainability through an alternative property-rights regime for Bangladesh's mangrove forest	2013	N	N	N	N	N	Y	N	Organizing by type of property rights
Saayman, M and Saayman, A	Regional development and national parks in South Africa: Lessons learned	2010	N	N	N	Y	N	Y	N	Just indicates that different players in system interact
Salafsky, N., Cauley, H., Balachander, G., Cordes, B., Parks, J., Margoluis, C., Bhatt, S., Encarnacion, C., Russell, D., and Margoluis, R.	A Systematic Test of an Enterprise Strategy for Community-Based Biodiversity Conservation		Y	Y	Y	Y	N	Y	N
Salum, L. A.	Ecotourism and biodiversity conservation in Jozani-Chwaka Bay National Park, Zanzibar	2009	Y	N	N	Y	N	Y	N	Describes link between ecotourism and social/biodiversity outcomes but does not detail how or what steps
Sarkar, S.; Montoya, M.	Beyond parks and reserves: The ethics and politics of conservation with a case study from Peru_	2011	N	Y	N	N	N	Y	N	Describes assumptions and preconditions of designing conservation but is not a causal pathway
Sarker, D.; Das, N.	Social capital and joint forest management programme: A comparative study of female-headed and joint Forest Protection Committees in west Bengal	2004	N	N	N	N	N	Y	N	Framework for measuring social capital - not causal
Schreckenberg, K. and Luttrell, C.	Participatory forest management: a route to poverty reduction?	2009	N	N	N	N	N	N	Y	No model, just conceptualizations of participatory forest management
Shaanker, R.U.; Ganeshaiah, K. N.; Krishnan, S.; Ramya, R.; Meera, C.; Aravind, N. A.; Kumar, A.; Rao, D.; Vanaraj, G.; Ramachandra, J.; Gauthier, R.; Ghazoul, J.; Poole, N.; Chinnappa Reddy, B. V.	Livelihood gains and ecological costs of non-timber forest product dependence: Assessing the roles of dependence, ecological knowledge and market structure in three contrasting human and ecological settings in south India	2004	Y	Y	N	Y	N	Y	N	Describes relationship between conditions and impacts but not clear the assumptions
Shahbaz, B.; Ali, T.; Awais, M.	Perceived impact of participation in forest management on natural and social capitals in mansehra district of Pakistan	2012	N	N	N	N	N	N	N	No model
Sifuna, N.	Wildlife damage and its impact on public attitudes towards conservation: A comparative study of Kenya and Botswana, with particular reference to Kenya's Laikipia Region and Botswana's Okavango Delta Region	2010	Y	N	N	Y	N	Y	N	Does not describe the steps, preconditions, nor assumptions of how mitigation and flow of information would lead to change
Sikor, T.; Nguyen, T. Q.	Why May Forest Devolution Not Benefit the Rural Poor? Forest Entitlements in Vietnam's Central Highlands	2007	Y	N	N	Y	N	Y	N	Describes links between devolved forests, forest endowments/entitlements but does not detail assumptions, mechanisms, nor steps
Sims, L.; Sinclair, A. J.	Learning through participatory resource management programs: Case studies from Costa Rica	2008	N	N	N	N	N	N	N	Not explicit about a model
Snyman, S.	Household spending patterns and flow of ecotourism income into communities around Liwonde National Park, Malawi	2013	Y	N	N	N	N	Y	N	Links ecotourism to livelihood diversification and education improvement but the steps are not clear and the assumptions and conditions are not described.
Solomon, J.; Jacobson, S. K.; Liu, I.	Fishing for a solution: Can collaborative resource management reduce poverty and support conservation?	2012	Y	Y	N	Y	N	Y	Y	Does not explain assumptions nor mechanisms of how change would occur
Stem, C. J.; Lassoie, J. P.; Lee, D. R.; Deshler, D. D.; Schelhas, J. W.	Community participation in ecotourism benefits: The link to conservation practices and perspectives	2003	Y	N	Y	N	N	Y	N	While it does explain to a degree some of the assumptions underlying the model, it's also not explicit to the steps between ICDPs and outcomes
Stone, M and Wall, G	Ecotourism and community development: case studies from Hainan, China	2004	Y	N	N	Y	N	Y	N	Demonstrates links between different elements in system but does not provide explicit explanation of why change occurs (just indicators)
Stone, M.T.	Protected Areas, Tourism and Rural Community Livelihoods in Botswana	2003	Y	N	N	Y	N	Y	N	Describes components that go into a community capitals framework but not how these are impacted by interventions nor assumptions underlying them
Tesfaye, Y.; Roos, A.; Bohlin, F.	Attitudes of local people towards collective action for forest management: the case of participatory forest management in Dodola area in the Bale Mountains, Southern Ethiopia	2012	N	N	Y	Y	N	Y	N	Includes theory of planned behavior as the mechanism by which attitudes influence outcomes but does not outline steps required nor conditions
Tesfaye, Y.; Roos, A.; Campbell, B. J.; Bohlin, F.	Factors Associated with the Performance of User Groups in a Participatory Forest Management around Dodola Forest in the Bale Mountains, Southern Ethiopia	2012	Y	N	Y	Y	N	Y	N	Describes assumptions of model but does not explain steps between components. Instead just outlines that differnet components are interlinked
Thakadu, O. T.	Success factors in community based natural resources management in northern Botswana: Lessons from practice	2005	N	N	Y	N	N	Y	N	Describes assumptions under CBNRM but does describe the link between CBNRM and outcomes nor steps required
Thakadu, O. T.; Irani, T. A.; Telg, R.	Predictors of Knowledge-Sharing Behaviors Among Community-Based Natural Resources Organizations in the Okavango Delta, Botswana	2013	Y	N	Y	Y	N	Y	Y	Explains assumptions and mechanisms but not steps (theory of planned behavior and REB framework)
Tieguhong, J. C.; Nkamgnia, E. M.	Household dependence on forests around Lobeke National Park, Cameroon	2012	N	N	N	N	Y	Y	N	Identifies components of forest income (categorizing framework)
Ting, Z.; Shivakoti, G. P.; Haiyun, C.; Maddox, D.	A survey-based evaluation of community-based co-management of forest resources: a case study of Baishuijiang National Natural Reserve in China	2012	N	N	N	N	N	N	N	Analysis framework categorizing outcomes and indicators
Toillier, A.; Serpanti_, G.; Herv_, D.; Lardon, S.	Livelihood strategies and land use changes in response to conservation: Pitfalls of community-based forest management in madagascar	2011	Y	Y	N	Y	N	Y	N	Does not outline assumptions nor really clear explain how
Tomicevic, J.; Shannon, M.A.; Milovanovic, M.	Socio-economic impacs on the attitudes towards conservation of natural resources: Case study from Serbia	2010	N	N	N	N	N	Y	N	Sustainable livelihoods framework as a way to categorize livelihoods assets
Toner, A.	Exploring sustainable livelihoods approaches in relation to two intereventions in Tanzania	2003	N	N	N	N	N	Y	N	Applying sustainable livelihoods thinking to understand interventions but links are not made clear (causal nor intermediate)
Torell, E; Redding, C.A.; Blaney, C.L.; Hernandez, E.; Sison, O.; Dyegula, J.; Robadue Jr., D.D.	Population, health, and environment situational analysis for the Saadani National Park Area, Tanzania	2012	Y	N	N	Y	N	Y	N	Details causal links between outcomes and intervention but no intermediate steps, conditions, nor assumptions
Tran, L.; Walter, P.	Ecotourism, gender and development in northern Vietnam	2014	N	Y	N	N	N	Y	N	Describes steps through which women can be empowered but its not clear link to intervention nor assumptions
Twayman, C.	Participatory conservation? Community-based natural resource management in Botswana	2000	N	N	N	N	N	Y	N	Review of different frameworks for understanding and categorizing CBNRM
Utting-Chamorro, Karla	Does fair trade make a difference? The case of small coffee producers in Nicaragua	2005	Y	N	N	Y	N	Y	N	Outlines financial flows between input and output but does not outline assumptions nor conditions
van Vliet, N.	Participatory vulnerability assessment in the context of conservation and development projects: A case study of local communities in Southwest Cameroon	2010	Y	Y	N	Y	N	Y	N	Does describe how change will happen nor assumptions
Vedeld, P.; Jumane, A.; Wapalila, G.; Songorwa, A.	Protected areas, poverty and conflicts. A livelihood case study of Mikumi National Park, Tanzania	2012	N	N	N	Y	N	Y	N	Applies sustainable livelihoods framework to categorize assets
Virapongse, A., Schmink, M., and Larkin, S.	Value Chain Dynamics of an Emerging Palm Fiber Handicraft Market in Maranhao, Brazil	2013	N	N	N	Y	N	Y	N	Value chains mapped out detailing flow of goods and financials not causal model
Vodouhe, F. G.; Coulibaly, O.; Adegbidi, A.; Sinsin, B.	Community perception of biodiversity conservation within protected areas in Benin	2010	N	N	Y	N	N	Y	N	Explains why knowledge and values would influence behaviors but does not illustrate a causal pathway in context of the intervention
Vyamana, V.G.	Participatory Forest Management in the Eastern Arc Mountains of Tanzania: who benefits?	2009	N	N	N	N	N	Y	N	suSTAInable livelihoods framework as a way to categorize livelihoods assets
Wandersee, S. M.; An, L.; L_pez-Carr, D.; Yang, Y.	Perception and decisions in modeling coupled human and natural systems: A case study from Fanjingshan National Nature Reserve, China	2012	N	Y	N	N	N	Y	N	Attempt to consider perception as condition for decision-making but does not detail how this fits in causal pathways between intervention and outcome
Westermann, O.; Ashby, J.; Pretty, J.	Gender and social capital: The importance of gender differences for the maturity and effectiveness of natural resource management groups	2005	Y	Y	N	N	N	Y	N	Describes components that are linked between gender and NRM but does not outline steps nor conditions
Wunder, S.	Ecotourism and economic incentives - An empirical approach		Y	Y	Y	Y	N	Y	Y
Yami, M.; Mekuria, W.; Hauser, M.	The effectiveness of village bylaws in sustainable management of community-managed exclosures in Northern Ethiopia	2013	Y	N	N	Y	N	Y	N	States relationships but not assumptions nor steps
Zhang, H.; Lei, S. L.	A structural model of residents' intention to participate in ecotourism: The case of a wetland community	2012	Y	Y	N	Y	N	Y	N	Does not explain assumptions behind hypotheses
Zuka, S.	Myths and realities in community management of common pool resources in Malawi: social stratification as a negative side-effect of social capital	2013	N	N	N	N	N	N	N	No model
Zulu, L.	Bringing people back into protected forests in developing countries: Insights from co-management in Malawi	2013	N	N	N	Y	N	Y	N	Uses political ecology approach to detail decision structure at different scales, not causal
Zulu, L.	Community forest management in Southern Malawi: Solution or part of the problem?	2008	N	Y	N	Y	N	Y	N	Model characterizing components and pre-conditions for community conservation but not explciitly linking to outcomes
			87			100	16	169	11
			114
			201
